# Supplementary material
Source: PubMed Central journal article supplement (PMC3128966)
Supplement: embor201178s1.pdf [file embor201178s1.pdf]

## Antagonistic regulation of EMT by TIF1 $\gamma$ and Smad4 in mammary epithelial cells

Hesling C, Fattet L, Teyre G, Jury D, Gonzalo P, Lopez J, Vanbelle C, Morel AP, Gillet G, Mikaelian I, Rimokh R

### SUPPLEMENTARY INFORMATION

#### Methods

**Microarray Analysis.** Transcriptomic microarray analysis was performed on HMEC-TR cells silenced for TIF1 $\gamma$  or Smad4 (si-control, si1-TIF1 $\gamma$  or si1-Smad4). The regulation of EMT by TGF $\beta$ 1 involves several cellular responses; we consequently examined changes in gene expression at 24 hours after TGF $\beta$ 1 treatment. Efficient TIF1 $\gamma$  and Smad4 silencing was checked by quantitative RT-PCR and Western Blotting (Fig S1). RNA quality was assessed using an Agilent Bioanalyzer (model 2100; Agilent Technologies). Before hybridization, RNA was amplified to obtain cRNA and was labeled using One-Cycle cDNA Synthesis Kit (Affymetrix) according to the manufacturer's instructions. The stained arrays were scanned on an Affymetrix GeneChip Scanner 3000-7G. The raw signal was extracted and normalized using GeneChip Operating Software version 1.4 (GCOS1.4). All quality controls were in the expected range indicated by Affymetrix. A given mRNA transcript was considered differentially expressed in a comparison of any two samples if the difference between expression levels had a p value of  $\leq 0.05$  in the Welch Anova parametric test using a multiple test correction (Benjamini and Hochberg false discovery rate). TIF1 $\gamma$  and Smad4 target genes were classified in three subgroups by GeneSpring filtering using a combination of three cut-offs as shown in Table S1. Genes whose expression was modified by TIF1 $\gamma$  or Smad4 knockdown after TGF $\beta$ 1 treatment were identified from the list of TGF $\beta$ 1-dependent genes based on the average ratios of si-TIF1 $\gamma$ +/ctrl+ ( $>1.5$ ) and si-Smad4+/ctrl+ ( $>1.5$ ) respectively (Table S1). Both siTIF1 $\gamma$ +/ctrl- and si-Smad4+/ctrl- ratios were calculated and are presented in comparison with the ctrl+/ctrl- ratio. We identified 1047 genes whose expression was exclusively modified by Smad4 inhibition (Smad4-dependent and TIF1 $\gamma$ -independent genes, SDTI), 457 genes whose expression was modified by the down-regulation of both proteins (Smad4-dependent and TIF1 $\gamma$ -dependent genes, SDTD) and 250 genes exclusively regulated by TIF1 $\gamma$  knockdown (Smad4-independent and TIF1 $\gamma$ -dependent genes, SITD). The three complete lists are shown in Supplementary data (Table S2).

**Immunoprecipitation and western blot analysis.** TIF1 $\gamma$  and/or flag-Smad3 expression vectors were transfected, either alone or in combination, into HMEC-TR cells using FuGENE HD (Roche). The cells were then incubated for 48h and treated or not with TGF $\beta$ 1 for 2h, and total cell lysates were collected. The proteins were immunoprecipitated with anti-Flag (Euromedex) or anti-TIF1 $\gamma$  (Bethyl) antibodies and Protein A/G-agarose (Fast Flow, Millipore), separated by SDS/PAGE (10%), electroblotted onto PVDF transfer membrane, stained with the specific primary antibodies anti-flag EL1B11 (Euromedex), anti-Smad4 (SantaCruz biotechnology), anti-TIF1 $\gamma$  (Euromedex) and horseradish-peroxidase-linked secondary antibodies, and then detected with ECL plus reagent (Roche).

**Luciferase assays.** HMEC-TR cells were transfected or not with siRNAs in 24-well-plates, cultured in complete medium for 24h and then co-transfected with 150 ng of (CAGA)<sub>9</sub>-MLP-Luc (Dennler *et al.*, 1998) or PAI-1 promoter (p800-Luc) luciferase constructs and 50 ng of the indicated construct (pSG5-TIF1 $\gamma$  or Smad4) expressing vectors. The pRL-TK vector (25 ng; Promega) was used as internal control for transfection efficiency. After transfection, the cells were cultured for an additional 24h in complete medium with or without TGF $\beta$ 1. Transfected cells were then washed and collected. Luciferase activity was measured in equivalent amounts of each lysate using the dual luciferase kit (Promega). Luciferase firefly activity was normalized to the *Renilla* luciferase activity of the pRL-TK vector. Experiments were performed in triplicate and each set was repeated at least three times.

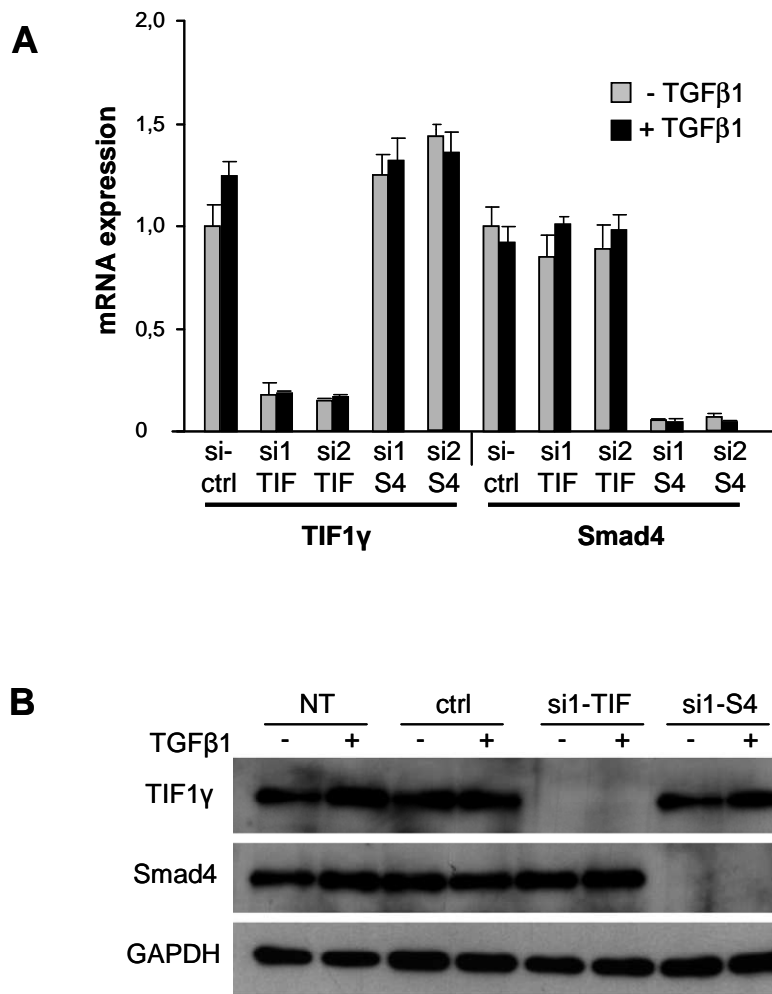

**Fig S1:** Validation of TIF1 $\gamma$  and Smad4 transient down regulation. HMEC-TR cells transfected with control siRNA (ctrl) or two siRNA sequences targeting human TIF1 $\gamma$  or Smad4 mRNA were treated with TGF $\beta$  for 24h. **(A)** Expression of TIF1 $\gamma$  and Smad4 was determined by quantitative PCR. Values were normalized to the amount of HPRT mRNA and expressed relative to the value obtained in control TGF $\beta$ 1-untreated cells. The experiment shown is representative of five separate experiments performed in triplicate. Error bars represent s.d. **(B)** The levels of endogenous TIF1 $\gamma$ , Smad4 and GAPDH were determined by immunoblotting. ctrl, control; TIF, TIF1 $\gamma$ ; S4, Smad4.

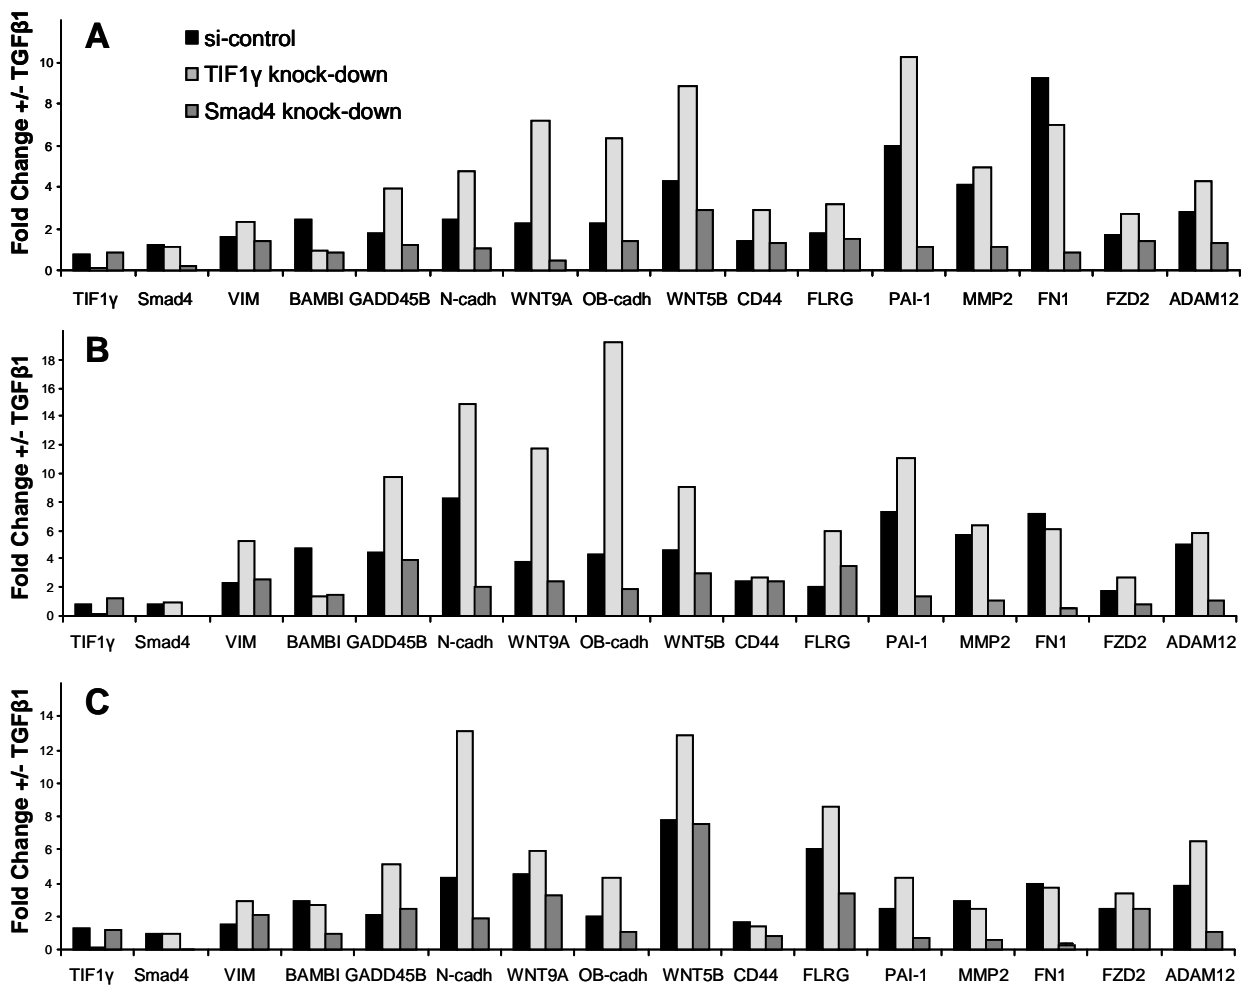

**Fig S2:** Validation of microarray results. (A) Results from microarray experiments. (B) The two independent RNA extractions performed for microarray experiments were used to quantify the expression of 16 selected genes by qRT-PCR. (C) Two additional and independent RNA extractions from HMEC-TR cells were used to quantify the expression of selected genes. All values were normalized to the amount of HPRT mRNA and expressed relative to the value obtained in control TGF $\beta$ 1-untreated cells. For B and C, the data shown correspond to one of two independent experiments performed in triplicate, with comparable results. VIM, Vimentin; cadh, cadherin. ctrl, control; TIF, TIF1 $\gamma$ ; S4, Smad4.

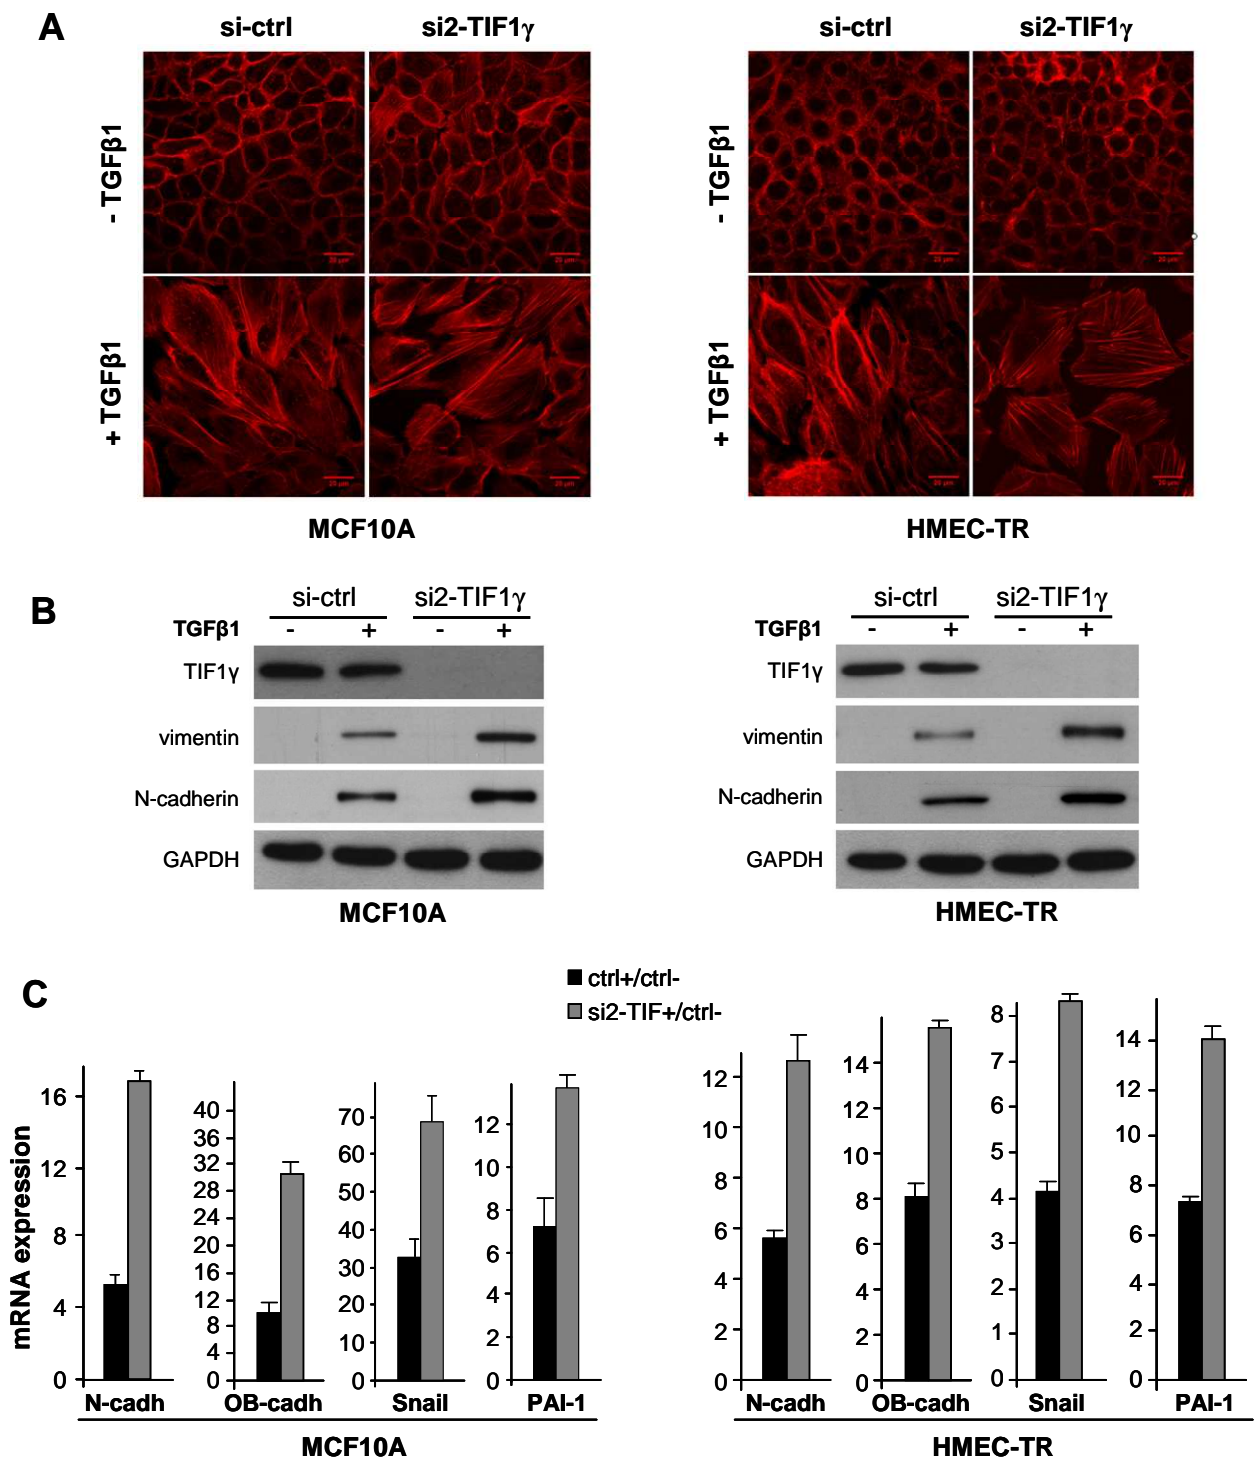

**Fig S3:** Inactivation of TIF1 $\gamma$  expression enhances TGF $\beta$ 1-induced EMT. MCF10A and HMEC-TR cells transfected with control siRNA (ctrl) or siRNA#2 targeting human TIF1 $\gamma$  were treated with TGF $\beta$  for 96h. (A) Immunofluorescence confocal acquisitions showing actin subcellular localization detected by phalloidin. Bars = 20  $\mu$ m. (C) Endogenous TIF1 $\gamma$ , Vimentin and N-cadherin levels were determined by immunoblotting. GAPDH served as a loading control. (D) MCF10A and HMEC-TR cells transfected with control siRNA (ctrl) or siRNA#2 targeting human TIF1 $\gamma$  were treated with TGF $\beta$  for 9h. Expression of N-Cadherin (N-cadh), OB-Cadherin (OB-cadh), Snail and PAI-1 was determined by quantitative RT-PCR. Values were normalized to the amount of HPRT mRNA and expressed relative to the value obtained in TGF $\beta$ 1-untreated controls. Error bars represent s.d. The experiment shown is representative of at least two separate experiments performed in triplicate.

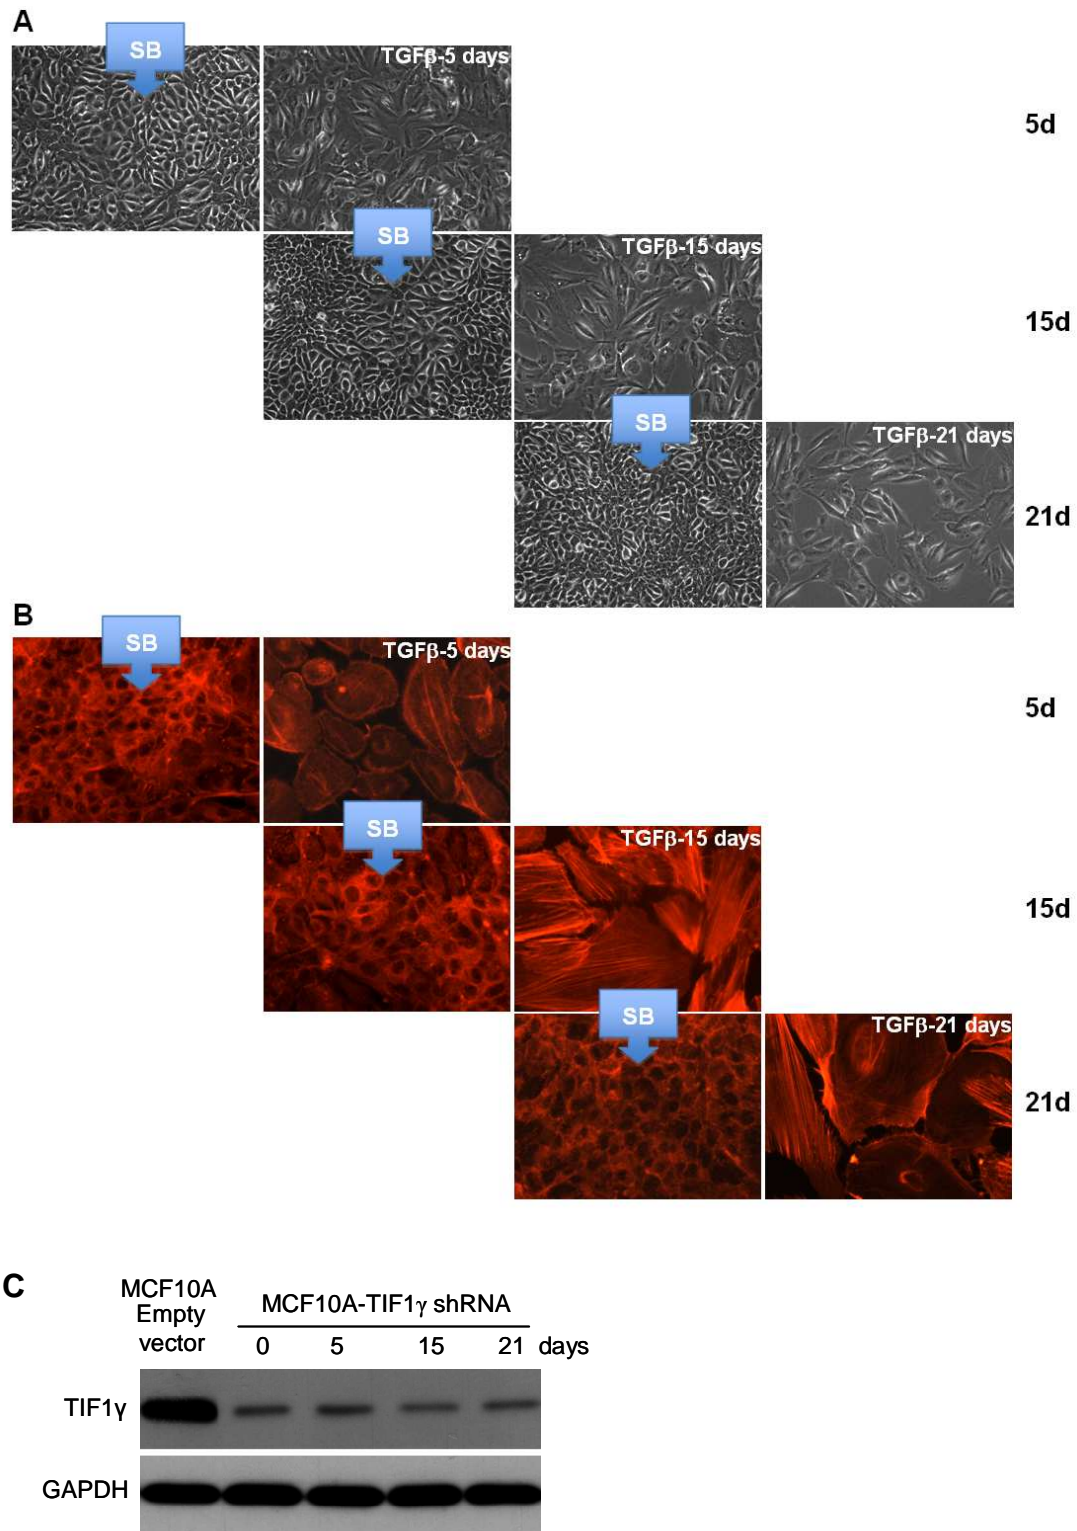

**Fig. S4:** MCF10A cells stably infected with sh(TIF1 $\gamma$ ) retrovirus (Open Biosystems) were exposed to TGF $\beta$ 1 during 21 days. Cells gradually reverted back to epithelial cells resembling parental MCF10A cells after TGF $\beta$ 1 removal and adjunction of T $\beta$ RI kinase inhibitor (SB-431542). (A) Phase contrast images (x10) and (B) immunofluorescence acquisitions showing actin subcellular localization detected by phalloidin (x40). SB, SB-431542; d, days. (C) TIF1 $\gamma$  levels were determined by immunoblotting in parental MCF10A cells and in MCF10A cells stably infected with sh(TIF1 $\gamma$ ) retrovirus. GAPDH served as a loading control.

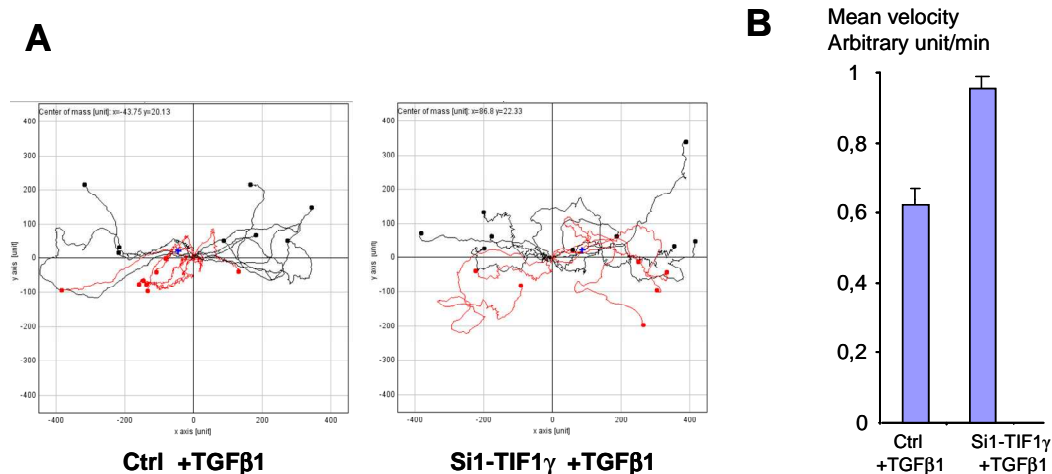

**Fig S5:** Inactivation of TIF1 $\gamma$  increases TGF $\beta$ 1-induced cell motility. MCF10A cells were grown to confluence with or without addition of TGF $\beta$ 1. Medium was aspirated and a gel filter tip was drawn carefully through the monolayer to create a wound between cells. Cells were then washed with PBS and fresh medium was added, with or without TGF $\beta$ 1. The healing process was observed by timelapse video microscopy. The migration patterns of individual cells were determined by timelapse on duplicates. In cells inactivated or not for TIF1 $\gamma$  and treated with TGF $\beta$ , the migration path of 8 cells from the wound edge was tracked with the Manual Tracking plug-in developed by F. Cordelières (Orsay, France). The traces were reported on a diagram (A). (B) The mean velocity was calculated on the 16 tracks with the Chemotaxis Tool from Ibidi (G. Trapp). Error bars represent s.d.

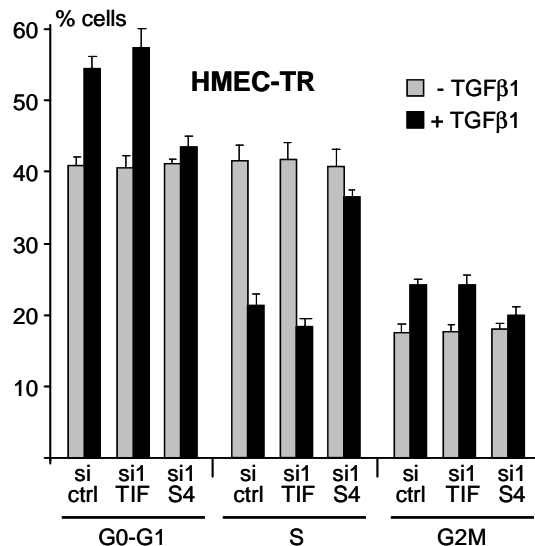

**Fig S6:** Inactivation of TIF1 $\gamma$  expression had no effect on cell cycle distribution. Cell cycle distribution of TIF1 $\gamma$  or Smad4-inactivated cells cultured or not with TGF $\beta$ 1 for 96h. Harvested cells were fixed in 75% ethanol at 4°C, then treated with RNase III and stained with propidium iodide. Cell cycle distribution was analyzed using a FACS Canto II (Becton Dickinson).

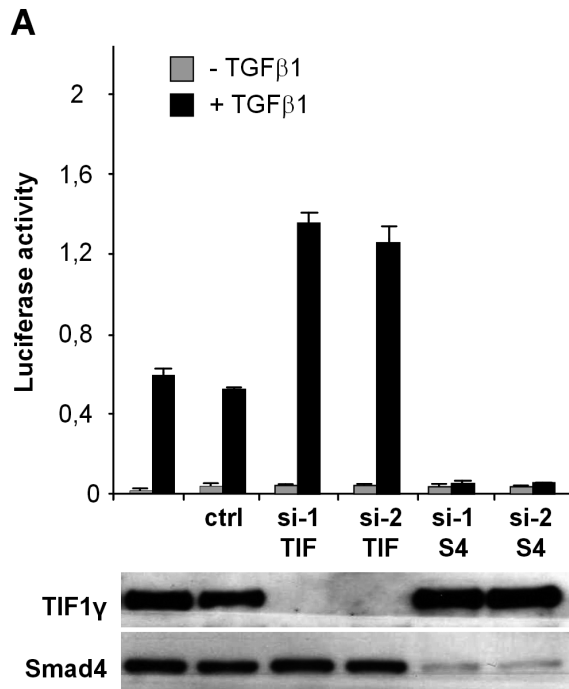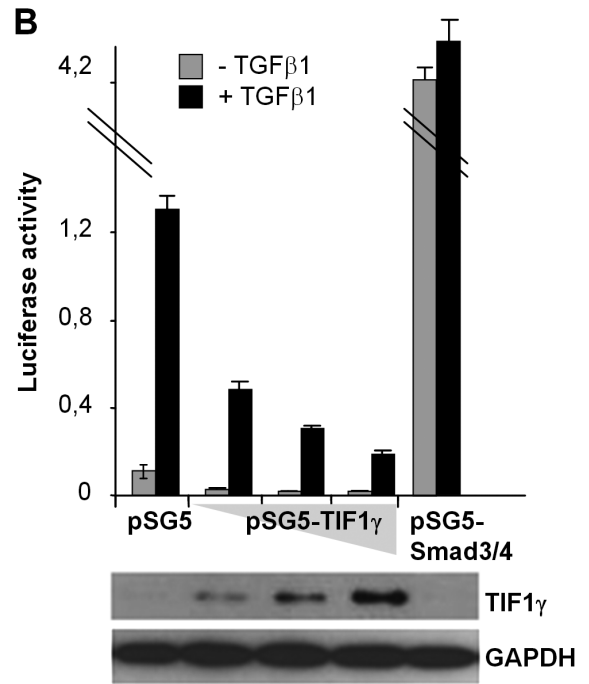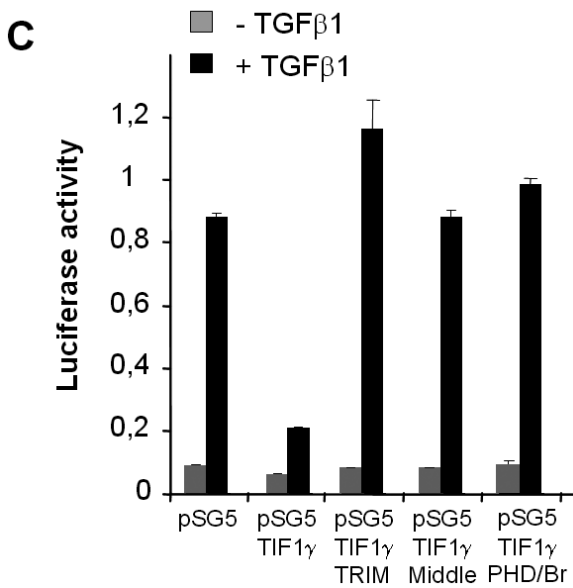

**Fig S7:** TIF1 $\gamma$  inhibits TGF $\beta$ 1 signaling. HMEC-TR were cotransfected with the pGL3(CAGA)-Luc reporter vector (known to be driven by the activated Smad complex) together with the pRL-CMV internal control vector and si-RNA (A) or the expression vectors indicated (B,C). Twenty-four hours before harvesting, transfected cells were either stimulated by TGF $\beta$ 1 or left unstimulated, then luciferase activity was determined. The relative luciferase activity is given as the mean  $\pm$  s.d. of one experiment performed in triplicate, representative of three experiments. Expression levels of TIF1 $\gamma$ , Smad4 and GAPDH proteins are shown. ctrl, control; TIF, TIF1 $\gamma$ ; S4, Smad4. Isolated TIF1 $\gamma$  domains (TRIM, nt 1-1368; Middle, nt 1369-2664; PHD/Br, nt 2665-

3390) were cloned in pSG5-flag expression vector. As previously shown (Dupont *et al.*, 2005; 2009), inactivation of TIF1 $\gamma$  enhanced the TGF $\beta$ 1-transcriptional response of the artificial (CAGA)<sub>9</sub>-MLP-Luc reporter (A). In addition, TIF1 $\gamma$  was found to inhibit the transcriptional activity of the reporter construct in a dose-dependent manner (B). Isolated domains of TIF1 $\gamma$  (TRIM, middle or PHD/Br) are void of biological effect on luciferase reporter construct (C).

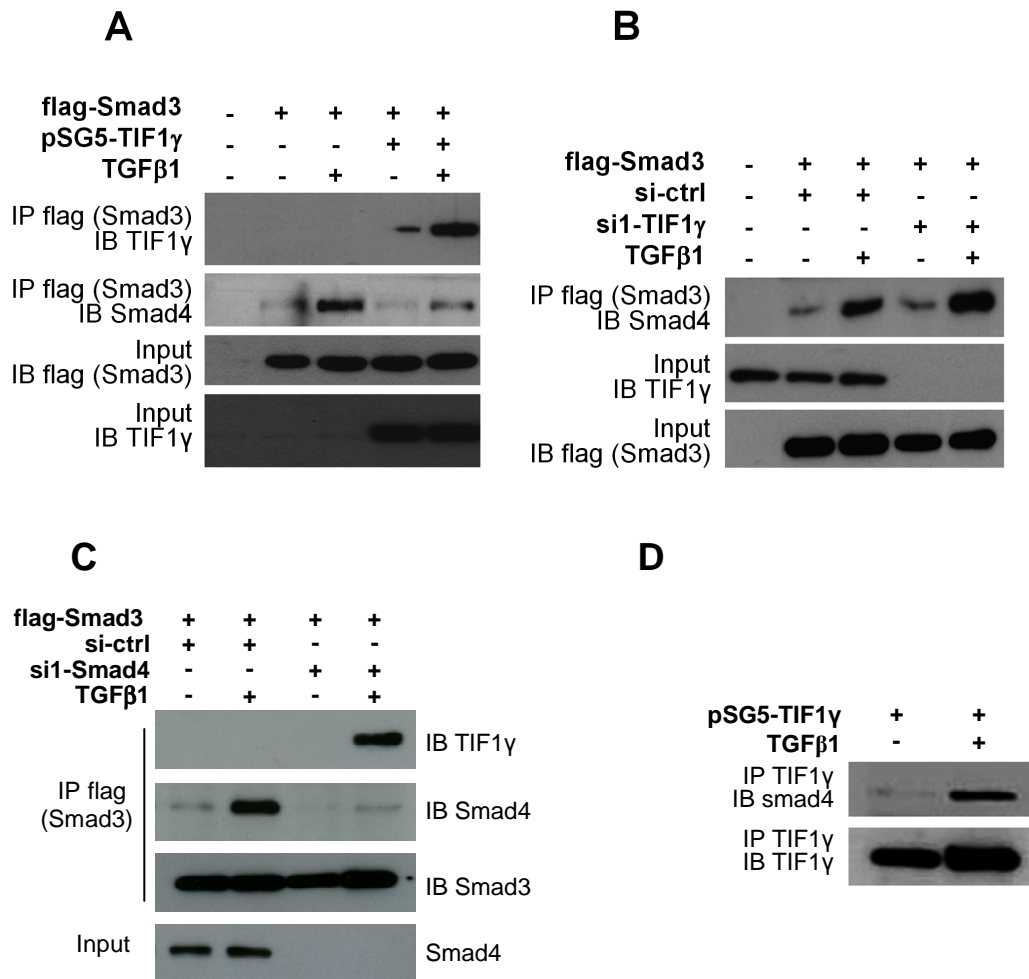

**Fig S8:** TIF1 $\gamma$  inhibits Smad3/4 complexes. HMEC-TR cells were transfected with the indicated vectors, control siRNA (ctrl) or siRNA targeting human TIF1 $\gamma$  mRNA. 48h post-transfection, the cells were treated or not with TGF $\beta$ 1 for 2h. Lysates were immunoprecipitated (IP) and immunoblotted (IB) as indicated. Protein expression was monitored by immunoblot analysis of total cell extracts (Input). As previously shown (He *et al.*, 2006), over-expression of TIF1 $\gamma$  in HMEC-TR cells decreased Smad3/Smad4 interaction (A) whereas TIF1 $\gamma$  down-regulation favored the formation of Smad3/Smad4 complex (B). In cells overexpressing TIF1 $\gamma$ , TIF1 $\gamma$  could be coimmunoprecipitated with Smad3, this interaction being enhanced by TGF $\beta$ 1 treatment (A). In cells inactivated for Smad4, the Smad3/TIF1 $\gamma$  complex was more abundant (C). TIF1 $\gamma$  has been shown to interact with Smad4 and to act as a RING-finger ubiquitin ligase for Smad4, regulating Smad4 localization (Dupont *et al.*, 2005; 2009). We found that Smad4 could be coimmunoprecipitated with TIF1 $\gamma$  in HMEC-TR cells, this interaction being enhanced by TGF $\beta$ 1 treatment (D).



**Table S1:** SITD, SDTD and SDTI groups of TGF $\beta$ 1-dependent genes were identified based on the indicated combination of 3 cut off values shown in the table. FC, Fold Change.

|                                                      | <b>ctrl+/ctrl-</b> | <b>si-Smad4+/ctrl+</b> | <b>si-TIF1<math>\gamma</math>+/ctrl+</b> |
|------------------------------------------------------|--------------------|------------------------|------------------------------------------|
| Smad4 Independent and TIF1 $\gamma$ Dependant (SITD) | FC>1.3 and FC<0.77 | 0.66<FC<1.5            | FC>1.5 and FC<0.66                       |
| Smad4 Dependent and TIF1 $\gamma$ Dependent (SDTD)   | FC>1.3 and FC<0.77 | FC>1.5 and FC<0.66     | FC>1.5 and FC<0.66                       |
| Smad4 Dependent and TIF1 $\gamma$ Independent (SDTI) | FC>1.3 and FC<0.77 | FC>1.5 and FC<0.66     | 0.66<FC<1.5                              |

**Table S2:** Three complete lists are shown in the excel file:

SDTI: Smad4-dependent and TIF1 $\gamma$ -independent probes

SDTD: Smad4-dependent and TIF1 $\gamma$ -dependent probes

SITD: Smad4-independent and TIF1 $\gamma$ -dependent probes

**Table S3:** TGF $\beta$ 1 target genes regulated by TIF1 $\gamma$  and potentially involved in EMT process. Genes showing an opposite response to Smad4 or TIF1 $\gamma$  down-regulation are presented in bold. \* Target genes for which quantitative RT-PCR was performed. S4, Smad4; TIF, TIF1 $\gamma$

| Gene symbol                                               | Gene name                                                     | ctrl+/ctrl- | si-S4+/ctrl- | si-TIF+/ctrl- |
|-----------------------------------------------------------|---------------------------------------------------------------|-------------|--------------|---------------|
| <b>Cell adhesion/ cell-surface proteins</b>               |                                                               |             |              |               |
| <b>ADAM12</b> *                                           | a disintegrin and metalloproteinase domain 12 (meltrin alpha) | 2.83        | 1.31         | <b>4.25</b>   |
| <b>CDH11</b> *                                            | cadherin 11. type 2. OB-cadherin (osteoblast)                 | 2.25        | 1.42         | <b>6.29</b>   |
| <b>CDH2</b> *                                             | cadherin 2. type 1. N-cadherin (neuronal)                     | 2.38        | 1.05         | <b>4.76</b>   |
| CELSR2                                                    | cadherin. EGF LAG seven-pass G-type receptor 2                | 1.38        | 0.86         | 0.81          |
| CLDN14                                                    | claudin 14                                                    | 3.38        | 1.45         | 1.39          |
| CLDN4                                                     | claudin 4                                                     | 3.15        | 0.89         | 1.43          |
| CLU                                                       | clusterin                                                     | 2.03        | 1.56         | 1.24          |
| CNTNAP3                                                   | cell recognition molecule CASPR3                              | 1.58        | 1.44         | 0.90          |
| DSG3                                                      | desmoglein 3 (pemphigus vulgaris antigen)                     | 1.52        | 0.83         | 0.54          |
| EPPK1                                                     | epiplakin 1                                                   | 1.81        | 0.61         | 0.71          |
| JPH1                                                      | junctionophilin 1                                             | 0.41        | 0.76         | 0.27          |
| MLLT4                                                     | mixed-lineage leukemia (trithorax homolog. Drosophila)        | 1.44        | 0.88         | 0.92          |
| OCLN                                                      | occludin                                                      | 1.60        | 0.95         | 0.80          |
| PDGFC                                                     | platelet derived growth factor C                              | 1.45        | 1.22         | 2.36          |
| <b>PKP1</b>                                               | plakophilin 1 (ectodermal dysplasia/skin fragility syndrome)  | 2.13        | 1.16         | <b>3.66</b>   |
| PODXL                                                     | podocalyxin-like                                              | 2.73        | 0.43         | 1.65          |
| PVRL4                                                     | poliovirus receptor-related 4                                 | 1.95        | 1.00         | 1.21          |
| SELL                                                      | selectin L (lymphocyte adhesion molecule 1)                   | 1.63        | 1.1          | 1.04          |
| STYK1                                                     | protein kinase STYK1                                          | 1.47        | 1.1          | 0.60          |
| HNT                                                       | neurotrimin                                                   | 2.65        | 0.52         | 0.68          |
| KAL1                                                      | Kallmann syndrome 1 sequence                                  | 2.13        | 0.91         | 1.20          |
| CD58                                                      | CD58 antigen. (lymphocyte function-associated antigen 3)      | 3.92        | 1.90         | 1.77          |
| TSPAN-2                                                   | tetraspan 2                                                   | 3.64        | 0.85         | 2.33          |
| <b>Matrix extra cellular proteins</b>                     |                                                               |             |              |               |
| COL1A1                                                    | collagen. type I. alpha 1                                     | 6.54        | 0.19         | 0.41          |
| <b>COL5A1</b>                                             | collagen. type V. alpha 1                                     | 5.59        | 1.60         | <b>9.40</b>   |
| COL5A2                                                    | collagen. type V. alpha 2                                     | 2.29        | 0.64         | 1.10          |
| ECM1                                                      | extracellular matrix protein 1                                | 1.80        | 0.36         | 0.60          |
| MMP10                                                     | matrix metalloproteinase 10 (stromelysin 2)                   | 4.44        | 0.15         | 0.48          |
| MMP28                                                     | matrix metalloproteinase 28                                   | 1.49        | 0.48         | 0.60          |
| SERPINB1                                                  | serine (or cysteine) proteinase inhibitor. clade B. member 1  | 1.59        | 0.39         | 0.43          |
| SERPINB13                                                 | serine (or cysteine) proteinase inhibitor. clade B. member 13 | 1.63        | 0.38         | 0.21          |
| SERPINB5                                                  | serine (or cysteine) proteinase inhibitor. clade B. member 5  | 1.72        | 0.84         | 1.04          |
| <b>SERPINE1</b> *                                         | plasminogen activator inhibitor type 1 (PAI-1)                | 5.95        | 1.14         | <b>10.26</b>  |
| SPP1                                                      | secreted phosphoprotein 1 (osteopontin. bone sialoprotein I)  | 1.69        | 0.35         | 0.45          |
| TIMP3                                                     | tissue inhibitor of metalloproteinase 3                       | 1.58        | 0.62         | 0.52          |
| TNC                                                       | tenascin C (hexabrachion)                                     | 1.79        | 0.51         | 0.56          |
| <b>Cytoskeleton</b>                                       |                                                               |             |              |               |
| FLNC                                                      | filamin C. gamma (actin binding protein 280)                  | 1.80        | 1.48         | 1.17          |
| KRT16                                                     | keratin 16                                                    | 2.13        | 0.4          | 0.61          |
| KRT9                                                      | keratin 9 (epidermolytic palmoplantar keratoderma)            | 1.43        | 0.78         | 0.94          |
| <b>KRTHA4</b>                                             | keratin. hair. acidic. 4 (intermediate filament)              | 5.78        | 2.28         | <b>12.02</b>  |
| MYLIP                                                     | myosin regulatory light chain interacting protein             | 0.67        | 0.64         | 0.42          |
| MYLK                                                      | myosin. light polypeptide kinase                              | 1.38        | 1.24         | 0.76          |
| MYO10                                                     | myosin X                                                      | 1.59        | 1.62         | 2.77          |
| MYO5B                                                     | myosin VB                                                     | 1.42        | 0.69         | 0.61          |
| NEXN                                                      | nexilin (F actin binding protein)                             | 0.73        | 0.6          | 0.34          |
| NRAP                                                      | nebulin-related anchoring protein                             | 1.75        | 1.43         | 1.10          |
| TPM1                                                      | tropomyosin 1 (alpha)                                         | 4.55        | 1.18         | 2.0           |
| <b>Microtubule/Microtubule associated protein/Spindle</b> |                                                               |             |              |               |
| BPAG1                                                     | bullous pemphigoid antigen 1. 230/240kDa                      | 0.58        | 0.33         | 0.16          |
| <b>EML1</b>                                               | echinoderm microtubule associated protein like 1              | 1.83        | 0.80         | <b>2.75</b>   |
| KIF11                                                     | kinesin family member 11                                      | 0.56        | 0.55         | 0.33          |

|                                       |                                                             |      |      |             |
|---------------------------------------|-------------------------------------------------------------|------|------|-------------|
| MICAL2                                | NIH_MGC_69 Homo sapiens cDNA clone IMAGE:3886131            | 1.58 | 1.78 | 2.78        |
| MID1                                  | midline 1 (Opitz/BBB syndrome)                              | 1.45 | 1.13 | 0.64        |
| SSX2IP                                | synovial sarcoma. X breakpoint 2 interacting protein        | 0.69 | 0.58 | 0.32        |
| TPX2                                  | TPX2. microtubule-associated protein homolog (Xenopus)      | 0.70 | 0.83 | 0.43        |
| TTL                                   | tubulin tyrosine ligase                                     | 0.71 | 2.0  | 1.34        |
| <b>GTPase signaling/Ras signaling</b> |                                                             |      |      |             |
| ARF1                                  | ADP-ribosylation factor 1                                   | 1.36 | 1.72 | 0.89        |
| ARHGAP19                              | Rho GTPase activating protein 19                            | 0.69 | 0.8  | 0.34        |
| ARHGEF10                              | Rho guanine nucleotide exchange factor (GEF) 10             | 1.90 | 1.37 | 0.87        |
| ARHGEF2                               | rho/rac guanine nucleotide exchange factor (GEF) 2          | 0.63 | 0.46 | 1.45        |
| CD14                                  | CD14 antigen                                                | 0.62 | 0.54 | 0.31        |
| MLPH                                  | melanophilin                                                | 2.07 | 2.85 | 9.46        |
| MTSS1                                 | metastasis suppressor 1                                     | 1.58 | 1.37 | 2.95        |
| PAK2                                  | p21 protein (Cdc42/Rac)-activated kinase 2                  | 1.57 | 0.52 | 0.31        |
| <b>PIK3CD</b>                         | phosphoinositide-3-kinase. catalytic. delta polypeptide     | 2.48 | 1.35 | <b>4.01</b> |
| PSCD2                                 | pleckstrin homology. Sec7 and coiled-coil domains 2         | 1.43 | 1.39 | 2.47        |
| RAB40C                                | RAB40C. member RAS oncogene family                          | 1.93 | 1.37 | 2.25        |
| RAB7                                  | RAB7. member RAS oncogene family                            | 1.84 | 1.75 | 2.12        |
| RASA1                                 | RAS p21 protein activator (GTPase activating protein) 1     | 1.53 | 0.81 | 0.99        |
| RASA4                                 | DNA directed RNA polymerase II polypeptide J-related gene   | 1.78 | 0.83 | 0.77        |
| RHPN2                                 | rhophilin. Rho GTPase binding protein 2                     | 1.48 | 0.96 | 0.64        |
| RICS                                  | Rho GTPase-activating protein                               | 1.36 | 0.72 | 0.61        |
| SEC14L1                               | SEC14-like 1 (S. cerevisiae)                                | 1.62 | 2.26 | 3.74        |
| WASF3                                 | WAS protein family. member 3                                | 0.50 | 2.01 | 1.54        |
| <b>Hyaluronan/CD44 signaling</b>      |                                                             |      |      |             |
| ASB6                                  | ankyrin repeat and SOCS box-containing 6                    | 0.74 | 1.40 | 1.25        |
| CALML3                                | calmodulin-like 3                                           | 1.79 | 1.43 | 0.85        |
| CD44 *                                | CD44 antigen                                                | 1.44 | 1.34 | 2.89        |
| FANK1                                 | fibronectin type 3 and ankyrin repeat domains 1             | 2.27 | 0.66 | 0.82        |
| HAS3                                  | hyaluronan synthase 3                                       | 0.56 | 0.52 | 0.12        |
| HMMR                                  | hyaluronan-mediated motility receptor (RHAMM)               | 0.53 | 1.09 | 0.79        |
| <b>Integrin signaling</b>             |                                                             |      |      |             |
| AKAP9                                 | A kinase (PRKA) anchor protein (yotiao) 9                   | 2.32 | 1.25 | 1.27        |
| ILK                                   | integrin-linked kinase                                      | 1.39 | 1.39 | 2.26        |
| ITGA4                                 | integrin. alpha 4                                           | 0.55 | 1.18 | 0.35        |
| ITGA5                                 | integrin. alpha 5 (fibronectin receptor. alpha polypeptide) | 1.93 | 1.37 | 3.71        |
| ITGB3                                 | integrin. beta 3 (platelet glycoprotein IIIa. antigen CD61) | 8.26 | 1.26 | 3.89        |
| ITGB8                                 | integrin. beta 8                                            | 1.46 | 1.06 | 0.72        |
| <b>WNT Beta catenin signaling</b>     |                                                             |      |      |             |
| FZD2 *                                | frizzled homolog 2 (Drosophila)                             | 1.63 | 1.35 | 2.66        |
| INVS                                  | inversin                                                    | 0.61 | 0.74 | 0.40        |
| SIAH1                                 | seven in absentia homolog 1 (Drosophila)                    | 1.59 | 1.45 | 0.70        |
| SIP                                   | Siah-interacting protein                                    | 0.63 | 1.45 | 1.14        |
| TCF7L1                                | transcription factor 7-like 1 (T-cell specific. HMG-box)    | 1.56 | 0.79 | 0.51        |
| <b>WNT5A</b>                          | wingless-type MMTV integration site family. member 5A       | 2.44 | 1.44 | <b>3.90</b> |
| <b>WNT5B *</b>                        | wingless-type MMTV integration site family. member 5B       | 4.29 | 2.87 | <b>8.87</b> |
| <b>WNT9A *</b>                        | wingless-type MMTV integration site family. member 9A       | 2.23 | 0.44 | <b>7.17</b> |
| <b>Cell Differentiation</b>           |                                                             |      |      |             |
| EDG4                                  | endothelial differentiation. 4                              | 0.57 | 1.24 | 2.05        |
| SOCS2                                 | suppressor of cytokine signaling 2                          | 1.39 | 0.82 | 1.53        |
| SPRR1B                                | small proline-rich protein 1B (cornifin)                    | 1.50 | 0.40 | 0.24        |

**Table S4:** Functional classification of TGF $\beta$  dependent genes whose expression was modified by TIF1 $\gamma$  knock-down

| <b>Functional annotation</b> | <b>Number of genes</b> | <b>percent</b> |
|------------------------------|------------------------|----------------|
| EMT                          | 96                     | 13.56          |
| Regulation of transcription  | 63                     | 8.9            |
| Cell proliferation           | 61                     | 8.61           |
| Metabolism                   | 61                     | 8.61           |
| Apoptosis                    | 24                     | 3.39           |
| Other functions              | 118                    | 16.66          |
| Unknown functions            | 285                    | 40.25          |

**Table S5:** Genes exhibiting antagonistic responses to Smad4 and TIF1 $\gamma$  down-regulation.  
\* Target genes for which quantitative RT-PCR was performed.

| Gene symbol                                            | Description                                                      | ctrl+/ctrl- | Si-Smad4+/ctrl- | Si-TIF1 $\gamma$ +/ctrl- |
|--------------------------------------------------------|------------------------------------------------------------------|-------------|-----------------|--------------------------|
| <b>Cytoskeleton/Cell Junction/Cell-Matrix Proteins</b> |                                                                  |             |                 |                          |
| ADAM12 *                                               | a disintegrin and metalloproteinase domain 12 (meltrin alpha)    | 2.83        | 1.31            | 4.25                     |
| CDH11 *                                                | cadherin 11. type 2. OB-cadherin (osteoblast)                    | 2.25        | 1.42            | 6.29                     |
| CDH2 *                                                 | cadherin 2. type 1. N-cadherin (neuronal)                        | 2.38        | 1.05            | 4.76                     |
| COL5A1                                                 | collagen, type V, alpha 1                                        | 5.59        | 1.60            | 9.40                     |
| EML1                                                   | echinoderm microtubule associated protein like 1                 | 1.83        | 0.80            | 2.75                     |
| JPH1                                                   | junctophilin 1                                                   | 0.41        | 0.76            | 0.27                     |
| KRTHA4                                                 | keratin. hair. acidic. 4                                         | 5.78        | 2.28            | 12.02                    |
| PIK3CD                                                 | phosphoinositide-3-kinase. catalytic. delta polypeptide          | 2.48        | 1.35            | 4.01                     |
| PKP1                                                   | plakophilin 1 (ectodermal dysplasia/skin fragility syndrome)     | 2.13        | 1.16            | 3.66                     |
| SERPINE1 *                                             | plasminogen activator inhibitor type 1 (PAI-1)                   | 5.95        | 1.14            | 10.26                    |
| WNT9A*                                                 | wingless-type MMTV integration site family. member 9A            | 2.23        | 0.44            | 7.17                     |
| WNT5A                                                  | wingless-type MMTV integration site family. member 5A            | 2.44        | 1.44            | 3.90                     |
| <b>Metabolism</b>                                      |                                                                  |             |                 |                          |
| GLDC                                                   | glycine dehydrogenase (decarboxylating; glycine decarboxylase)   | 0.52        | 0.85            | 0.26                     |
| GLUL                                                   | Homo sapiens glutamine synthetase pseudogene. complete sequence. | 3.70        | 1.54            | 5.63                     |
| LOX                                                    | lysyl oxidase                                                    | 1.86        | 1.03            | 3.55                     |
| NOX5                                                   | NADPH oxidase. EF hand calcium-binding domain 5                  | 2.75        | 1.54            | 7.31                     |
| P4HA3                                                  | prolyl 4-hydroxylase alpha III                                   | 8.70        | 2.01            | 15.59                    |
| SLC27A2                                                | solute carrier family 27 (fatty acid transporter). member 2      | 0.52        | 0.92            | 0.25                     |
| TGM 2                                                  | transglutaminase 2                                               | 3.18        | 1.15            | 5.55                     |
| <b>Cell Proliferation</b>                              |                                                                  |             |                 |                          |
| GADD45B *                                              | growth arrest and DNA-damage-inducible. beta                     | 2.70        | 1.49            | 4.51                     |
| <b>Unknown Function</b>                                |                                                                  |             |                 |                          |
| BC041029                                               | MRNA; cDNA DKFZp686O13152                                        | 0.55        | 1.20            | 0.30                     |
| AW300131                                               | Transcribed sequences (AW300131)                                 | 1.73        | 1.01            | 2.97                     |
| AW139053                                               | Homo sapiens cDNA clone IMAGE:2718337 3'                         | 0.61        | 0.35            | 1.31                     |
| AW338214                                               | Clone IMAGE:5275753. mRNA                                        | 0.50        | 0.81            | 0.32                     |
| ANKRD22                                                | Hypothetical protein MGC22805                                    | 0.54        | 0.85            | 0.19                     |
| BJ-TSA-9                                               | Hypothetical protein MGC14128                                    | 1.65        | 0.89            | 2.65                     |
| C5orf13                                                | Chromosome 5 open reading frame 13                               | 1.80        | 1.07            | 3.39                     |
| FLJ23657                                               | Hypothetical protein FLJ23657                                    | 10.82       | 2.25            | 18.51                    |
| FLJ36031                                               | Hypothetical protein FLJ36031                                    | 1.47        | 0.83            | 2.52                     |
| FLJ90166                                               | Hypothetical protein FLJ90166                                    | 1.68        | 0.77            | 7.80                     |
| KCTD11                                                 | Homo sapiens cDNA clone IMAGE:2426829 3'                         | 1.83        | 0.92            | 2.95                     |
| LOC93109                                               | Hypothetical protein BC007772                                    | 1.69        | 1.09            | 2.73                     |
| MGC22679                                               | Homo sapiens cDNA clone IMAGE:3854163 5'                         | 0.40        | 0.88            | 0.24                     |
| SDPR                                                   | serum deprivation response (phosphatidylserine binding protein)  | 0.59        | 1.10            | 0.37                     |
| TGM2                                                   | AL031651                                                         | 4.33        | 1.15            | 9.05                     |
| <b>Other functions</b>                                 |                                                                  |             |                 |                          |
| PROC                                                   | protein C (inactivator of coagulation factors Va and VIIIa)      | 2.87        | 1.19            | 5.93                     |
| OPN3                                                   | opsin 3 (encephalopsin. panopsin)                                | 2.24        | 1.03            | 3.38                     |

**Table S6:** Genes involved in cell cycle and found in SDTI group. \* Target genes for which quantitative RT-PCR was performed.

| Gene symbol | Description                                                 | ctrl+/ctrl- | si-Smad4+/ctrl- | si-TIF1 $\gamma$ +/ctrl- |
|-------------|-------------------------------------------------------------|-------------|-----------------|--------------------------|
| ASK         | activator of S phase kinase                                 | 0.59        | 0.98            | 0.6                      |
| AURKB       | aurora kinase B                                             | 0.57        | 0.93            | 0.82                     |
| BRRN1       | barren homolog (Drosophila)                                 | 0.57        | 0.96            | 0.59                     |
| CCND2       | cyclin D2                                                   | 0.73        | 1.2             | 0.49                     |
| CCNF        | cyclin F                                                    | 0.56        | 0.98            | 0.79                     |
| CCNG2       | cyclin G2                                                   | 1.74        | 0.66            | 1.42                     |
| CDC25A      | cell division cycle 25A                                     | 0.58        | 0.92            | 0.58                     |
| CDC45L      | CDC45 cell division cycle 45-like (S. cerevisiae)           | 0.7         | 1.21            | 0.69                     |
| CDC6        | CDC6 cell division cycle 6 homolog (S. cerevisiae)          | 0.63        | 0.95            | 0.53                     |
| CDK4        | cyclin-dependent kinase 4                                   | 0.66        | 1.16            | 0.92                     |
| CDKN1A *    | cyclin-dependent kinase inhibitor 1A (p21. Cip1)            | 1.7         | 0.67            | 1.87                     |
| CDKN2B      | cyclin-dependent kinase inhibitor 2B (p15. inhibits CDK4)   | 4.27        | 1.07            | 3.22                     |
| CHC1        | chromosome condensation 1                                   | 0.61        | 1.28            | 0.77                     |
| DRIM        | down-regulated in metastasis                                | 0.51        | 1.12            | 0.67                     |
| DUSP22      | dual specificity phosphatase 22                             | 1.64        | 0.98            | 1.93                     |
| E2F5        | E2F transcription factor 5. p130-binding                    | 0.38        | 0.8             | 0.49                     |
| FANCD2      | Fanconi anemia. complementation group D2                    | 0.68        | 1.03            | 0.62                     |
| FGF2        | fibroblast growth factor 2 (basic)                          | 0.67        | 1.38            | 0.79                     |
| FGF5        | fibroblast growth factor 5                                  | 2.03        | 0.96            | 2.48                     |
| GADD45A     | growth arrest and DNA-damage-inducible. alpha               | 2.04        | 1.21            | 1.65                     |
| IFRD2       | interferon-related developmental regulator 2                | 0.59        | 1.05            | 0.77                     |
| IGFBP7      | insulin-like growth factor binding protein 7                | 1.89        | 0.89            | 2.15                     |
| IL15        | interleukin 15                                              | 2           | 1               | 1.87                     |
| INHBA       | inhibin. beta A (activin A. activin AB alpha polypeptide)   | 2.17        | 1.3             | 1.86                     |
| INSIG1      | insulin induced gene 1                                      | 2.23        | 0.86            | 2.15                     |
| ISG20       | interferon stimulated gene 20kDa                            | 1.59        | 0.79            | 1.1                      |
| KRAS2       | v-Ki-ras2 Kirsten rat sarcoma 2 viral oncogene homolog      | 2.3         | 1.25            | 2.47                     |
| LRP1        | low density lipoprotein-related protein 1                   | 2.14        | 1.16            | 2.56                     |
| LRP5        | low density lipoprotein receptor-related protein 5          | 0.61        | 1.04            | 0.84                     |
| MN1         | meningioma (disrupted in balanced translocation) 1          | 1.98        | 0.66            | 2.71                     |
| MXD4        | MAX dimerization protein 4                                  | 2.15        | 1               | 1.68                     |
| MYC *       | v-myc myelocytomatosis viral oncogene homolog (avian)       | 0.6         | 0.95            | 0.55                     |
| NAP1L1      | nucleosome assembly protein 1-like 1                        | 0.65        | 1.02            | 0.68                     |
| NME1        | non-metastatic cells 1                                      | 0.72        | 1.24            | 0.97                     |
| NOLC1       | nucleolar and coiled-body phosphoprotein 1                  | 0.57        | 1.07            | 0.52                     |
| PA2G4       | proliferation-associated 2G4. 38kDa                         | 0.6         | 0.92            | 0.8                      |
| PDGFA       | platelet-derived growth factor alpha polypeptide            | 2.36        | 1.14            | 1.82                     |
| PLK1        | polo-like kinase 1 (Drosophila)                             | 0.5         | 1.05            | 0.61                     |
| POLD4       | polymerase (DNA-directed). delta 4                          | 2.26        | 0.72            | 2.58                     |
| PPP6C       | protein phosphatase 6. catalytic subunit                    | 0.6         | 1.44            | 0.78                     |
| PRIM1       | nascent-polypeptide-associated complex alpha polypeptide    | 0.55        | 1.08            | 0.56                     |
| SASH1       | SAM and SH3 domain containing 1                             | 0.71        | 1.07            | 0.72                     |
| SKP2        | S-phase kinase-associated protein 2 (p45)                   | 0.42        | 0.67            | 0.48                     |
| SMAD3       | MAD. mothers against decapentaplegic homolog 3              | 0.55        | 0.83            | 0.73                     |
| SPOCK       | sparc/osteonectin (testican)                                | 2.35        | 0.8             | 2.5                      |
| TCF8        | transcription factor 8 (represses interleukin 2 expression) | 2.62        | 0.93            | 2.24                     |
| TIEG        | TGFB inducible early growth response                        | 1.61        | 0.83            | 1.31                     |
| TNFSF13     | tumor necrosis factor (ligand) superfamily. member 13       | 2.05        | 0.98            | 1.88                     |
| TNFSF9      | tumor necrosis factor (ligand) superfamily. member 9        | 1.72        | 0.93            | 1.6                      |

**Table S7:** si-RNAs used in the study.

| <b>Name</b>         | <b>Sequence</b>                                                          |
|---------------------|--------------------------------------------------------------------------|
| si-TIF1 $\gamma$ #1 | UUU CGC AGC ACA CAA GAG AUC UCC UCC<br>GGA GGA GAU CUC UUG UGC UGC GAA A |
| si-TIF1 $\gamma$ #2 | UUU CAC GGU GGA UAA AUC CAU UGG U<br>ACCAAUGGA UUU AUC CAC CGU GAA A     |
| si-Smad4#1          | GCA AUU GAA AGU UUG GUA A<br>U UAC CAA ACU UUC AAU UGC                   |
| si-Smad4#2          | CCC ACA ACC UUU AGA CUG A<br>U CAG UCU AAA GGU UGU GGG                   |
| Control             | 1027280 (Qiagen)                                                         |

siRNA used for TIF1 $\gamma$  are stealth siRNA from Life technologies-Invitrogen

**Table S8:** Quantitative RT-PCR primers used in the study

| <b>Gene</b>         | <b>Sequence</b>                                                         |
|---------------------|-------------------------------------------------------------------------|
| TIF1 $\gamma$       | PPH16274A (SA Biosciences)                                              |
| Smad4               | 5'GTG GAA TAG CTC CAG CTA TC3'<br>5'CGG CAT GGT ATG AAG TAC TCC3'       |
| Vimentin            | 5'CCA AAC TTT TCC TCC CTG AAC C3'<br>5'GTG ATG CTG AGA AGT TTC GTT GA3' |
| BAMBI               | PPH01947E (SA Biosciences)                                              |
| GADD45B             | 5'GTG GAT TAT AAT TGC AAC ATG ACG3'<br>5'TTG GCC GAC TCG TCA CCC3'      |
| CDH2 (N-Cadherin)   | 5'GTG CAT GAA GGA CAG CCT CT3'<br>5'ATG CCA TCT TCA TCC ACC TT3'        |
| WNT9A               | 5'CGC CTA CTT CGG GCT GAC3'<br>5'CTG CTT CCG CTC CAG CTT3'              |
| CDH11 (OB-Cadherin) | 5'CCC TGA AAT CAT TCA CAA TCC3'<br>5'AGT CCT GCT TCT GCC GAC T3'        |
| WNT5B               | 5'GGA CAA CGC ATC TGT CTT TGG3'<br>5'GCT GAT GGC GTT GAC CAC3'          |
| CD44                | 5'CTG GGG ACT CTG CCT CGT3'<br>5'GAG AGA TGC TGT AGC GAC CA3'           |
| FLRG                | 5'CAC TCG TCG CGG TAG GTG3'<br>5'TTC CCT GCA AAG ATT CGT G3'            |
| PAI-I               | PPH00215E (SA Biosciences)                                              |
| MMP2                | PPH00151B (SA Biosciences)                                              |
| FN1                 | PPH00143B (SA Biosciences)                                              |
| FZD2                | PPH02470A (SA Biosciences)                                              |
| ADAM12              | PPH07260E (SA Biosciences)                                              |
| CDKN1A              | 5'GAC ACC ACT GGA GGG TGA CT3'<br>5'CCA CAT GGT CTT CCT CTG CT3'        |
| c MYC               | 5'CTG CTG GGA GGA GAC ATG GT3'<br>5'TCC TGG ATG ATG ATG TTT TTG ATG3'   |
| SNAIL               | 5'GTC GCA GGA CTC TAA TCC AGA3'<br>ATC TCC GGA GGT GGG ATG              |
| ZEB1                | 5'ATC CTG GGG CCT GAA GCT CAG G3'<br>5'TGG TGT GCC CTG CCT CTG GT3'     |
| HMGA2               | 5'CCC AGG GGA AGA CCC AAA GGC3'<br>5'GTT GGC GCC CCC TAG TCC TCT3'      |
| HPRT                | 5'TGA CCT TGA TTT ATT TTG CAT ACC3'<br>5'CGA GCA AGA CGT TCA GTC CT3'   |
